# Supplementary material for: PPIs Are Not Responsible for Elevating Cardiovascular Risk in Patients on Clopidogrel—A Systematic Review and Meta-Analysis
Source: PubMed Central journal article supplement (PMC6252380; doi:10.3389/fphys.2018.01550), 2018-11-19
Supplement: Presentation_1.pdf [file Presentation_1.pdf]

**SUPPLEMENTARY MATERIAL**
**Supplementary Table 1A Baseline characteristics: population**

| Study                  | Country/region                                                                              | Mean follow-up     | Non PPI  | PPI      | Non PPI          | PPI              | Non PPI                       | PPI                           |
|------------------------|---------------------------------------------------------------------------------------------|--------------------|----------|----------|------------------|------------------|-------------------------------|-------------------------------|
|                        |                                                                                             |                    | Male (n) | Male (n) | Mean age (years) | Mean age (years) | Mean BMI (kg/m <sup>2</sup> ) | Mean BMI (kg/m <sup>2</sup> ) |
| Ayub et al, 2016       | South Asia                                                                                  | 24 months          | 216      | 331      | 56,2             | 57,8             | 26,5                          | 26,3                          |
| Gargiulo et al, 2016   | Italy                                                                                       | 24 months          | 976      | 535      | 68,1             | 71,2             | 26,9                          | 26,2                          |
| Weisz et al, 2015      | USA, Germany                                                                                | 24 months          | 4834     | 1522     | 63,3             | 64,6             | 29,5                          | 29,4                          |
| Hokimoto et al, 2014   | Japan                                                                                       | 18 months          | 89       | 28       | 68,8             | 69,7             | 24,3                          | 23,3                          |
| Shih et al, 2014       | Taiwan                                                                                      | 4 months           | 64675    | 64675    | 49,3             | 49,3             |                               |                               |
| Zou et al, 2014        | China                                                                                       | 12 months          | 1083     | 4548     | 65,7             | 66,2             | 25,2                          | 25,1                          |
| Burkard et al, 2012    | Switzerland                                                                                 | 36 months          | 75       | 553      | 63,3             | 66,5             |                               |                               |
| Chitose et al, 2012    | Japan                                                                                       | 18 months          | 326      | 139      | 69,6             | 69,7             | 24                            | 24,2                          |
| Goodman et al, 2012    | Europe, Middle East, Africa, Asia, Australia, North America, Central America, South America | 12 months          | 8585     | 4734     | 62               | 63               |                               |                               |
| Ng et al, 2012         | Hong Kong                                                                                   | 4 months           | 107      | 126      | 63,1             | 64,3             |                               |                               |
| Yano et al, 2012       | Japan                                                                                       | 12 months          | 52       | 50       | 66               | 67               |                               |                               |
| Hsu et al, 2011        | Taiwan                                                                                      | 6 months           | 59       | 65       | 73,3             | 70,6             |                               |                               |
| Ren et al, 2011        | China                                                                                       | 1 month            |          |          |                  |                  |                               |                               |
| Rossini et al, 2011    | NS                                                                                          | 12 months          |          |          |                  |                  |                               |                               |
| Simon et al, 2011      | France                                                                                      | 12 months          | 644      | 1058     | 65               | 64               | 27,5                          | 27,1                          |
| Bhatt et al, 2010      | 15 countries (NS)                                                                           | 3.5 months         | 1308     | 1255     | 68,7             | 68,5             | 28,3                          | 28,4                          |
| Cai et al, 2010        | NS                                                                                          | 1 month            |          |          |                  |                  |                               |                               |
| Charlot et al, 2010    | Denmark                                                                                     | At least 30 days   | 12801    | 1775     | 64,1             | 67,5             |                               |                               |
| Evanchan et al, 2010   | NS                                                                                          | 12 months          |          |          | 62,9             | 63,5             |                               |                               |
| Gupta et al, 2010      | USA                                                                                         | 50 months          |          |          | 62               | 61,7             |                               |                               |
| Hudzik et al, 2010     | Poland                                                                                      | 12 months          | 13       | 15       | 60,5             | 62,8             | 27,5                          | 27,1                          |
| Kreutz et al, 2010     | USA                                                                                         | NS                 |          |          |                  |                  |                               |                               |
| Ray et al, 2010        | USA                                                                                         | At least 12 months | 4776     | 3295     | 60,4             | 60,8             |                               |                               |
| Stockl et al, 2010     | USA                                                                                         | 12 months          | 573      | 588      | 68,9             | 69,2             |                               |                               |
| Van Boxel et al, 2010  | Netherlands                                                                                 | At least 12 months | 8296     | 3356     | 66,1             | 68,6             |                               |                               |
| O'Donoghue et al, 2009 | NS                                                                                          | NS                 | 58       | 19       | 64,1             | 63,1             | 29                            | 30,6                          |
| Rassen et al, 2009     | USA                                                                                         | 6 months           | 7523     | 1208     | 76,8             | 77,6             |                               |                               |

*BMI: body mass index; n: number of patients; NS: not specified; PPI: proton pump inhibitor*

**Supplementary Table 1B Baseline characteristics: other medications**

| Study                  | Non PPI       | PPI           | Non PPI    | PPI        |
|------------------------|---------------|---------------|------------|------------|
|                        | ACE-I/ARB (n) | ACE-I/ARB (n) | Statin (n) | Statin (n) |
| Ayub et al, 2016       |               |               |            |            |
| Gargiulo et al, 2016   |               |               | 1093       | 671        |
| Weisz et al, 2015      |               |               |            |            |
| Hokimoto et al, 2014   | 100           | 36            | 118        | 47         |
| Shih et al, 2014       | 15412         | 15413         | 7241       | 7242       |
| Zou et al, 2014        | 627           | 2364          | 1373       | 5724       |
| Burkard et al, 2012    |               |               |            |            |
| Chitose et al, 2012    | 148           | 318           | 317        | 124        |
| Goodman et al, 2012    |               |               |            |            |
| Ng et al, 2012         |               |               |            |            |
| Yano et al, 2012       |               |               |            |            |
| Hsu et al, 2011        |               |               |            |            |
| Ren et al, 2011        |               |               |            |            |
| Rossini et al, 2011    |               |               |            |            |
| Simon et al, 2011      | 156           | 184           | 220        | 281        |
| Bhatt et al, 2010      |               |               | 1254       | 1274       |
| Cai et al, 2010        |               |               |            |            |
| Charlot et al, 2010    | 9129          | 3708          | 16002      | 5684       |
| Evanchan et al, 2010   | 2884          | 960           | 3322       | 1060       |
| Gupta et al, 2010      | 110           | 39            | 159        | 49         |
| Hudzik et al, 2010     | 15            | 17            | 18         | 16         |
| Kreutz et al, 2010     |               |               |            |            |
| Ray et al, 2010        |               |               |            |            |
| Stockl et al, 2010     |               |               |            |            |
| Van Boxel et al, 2010  | 7686          | 3798          | 10578      | 4886       |
| O'Donoghue et al, 2009 |               |               | 65         | 24         |
| Rassen et al, 2009     | 5807          | 1686          | 6275       | 1639       |

ACE-I: angiotensin-converting enzyme inhibitor; ARB: angiotensin receptor blocker; n: number of patients; PPI: proton pump inhibitor

**Supplementary Table 1C Baseline characteristics: cardio- and cerebrovascular history**

| Study                  | Non PPI | PPI     | Non PPI | PPI    | Non PPI    | PPI        |
|------------------------|---------|---------|---------|--------|------------|------------|
|                        | PCI (n) | PCI (n) | MI (n)  | MI (n) | Stroke (n) | Stroke (n) |
| Ayub et al, 2016       |         |         |         |        |            |            |
| Gargiulo et al, 2016   | 229     | 119     | 321     | 199    |            |            |
| Weisz et al, 2015      | 2651    | 1025    | 1547    | 618    |            |            |
| Hokimoto et al, 2014   |         |         | 35      | 9      | 22         | 5          |
| Shih et al, 2014       |         |         |         |        | 15610      | 15609      |
| Zou et al, 2014        |         |         | 290     | 1071   |            |            |
| Burkard et al, 2012    | 115     | 15      | 24      | 193    |            |            |
| Chitose et al, 2012    |         |         | 100     | 55     | 45         | 29         |
| Goodman et al, 2012    |         |         |         |        |            |            |
| Ng et al, 2012         |         |         |         |        |            |            |
| Yano et al, 2012       | 1,3     | 5       | 0       | 4      |            |            |
| Hsu et al, 2011        |         |         | 54      | 59     | 27         | 33         |
| Ren et al, 2011        |         |         |         |        |            |            |
| Rossini et al, 2011    |         |         |         |        |            |            |
| Simon et al, 2011      | 93      | 96      | 125     | 141    | 35         | 41         |
| Bhatt et al, 2010      | 1334    | 1331    | 566     | 531    | 136        | 151        |
| Cai et al, 2010        |         |         |         |        |            |            |
| Charlot et al, 2010    |         |         |         |        |            |            |
| Evanchan et al, 2010   |         |         |         |        |            |            |
| Gupta et al, 2010      |         |         |         |        |            |            |
| Hudzik et al, 2010     |         |         | 14      | 13     |            |            |
| Kreutz et al, 2010     |         |         |         |        |            |            |
| Ray et al, 2010        |         |         |         |        | 1700       | 1503       |
| Stockl et al, 2010     | 827     | 825     | 546     | 554    | 8          | 4          |
| Van Boxel et al, 2010  |         |         | 4163    | 2001   | 370        | 203        |
| O'Donoghue et al, 2009 |         |         | 17      | 11     |            |            |
| Rassen et al, 2009     |         |         | 954     | 223    |            |            |

*MI: myocardial infarction; PCI: percutaneous coronary intervention; n: number of patients; PPI: proton pump inhibitor*

**Supplementary Table 1D Baseline characteristics: cardiovascular risk factors**

| Study                  | Non PPI          | PPI              | Non PPI | PPI    | Non PPI           | PPI               | Non PPI     | PPI         |
|------------------------|------------------|------------------|---------|--------|-------------------|-------------------|-------------|-------------|
|                        | Hypertension (n) | Hypertension (n) | DM (n)  | DM (n) | Dyslipidaemia (n) | Dyslipidaemia (n) | Smoking (n) | Smoking (n) |
| Ayub et al, 2016       | 162              | 294              | 106     | 177    | 131               | 176               |             |             |
| Gargiulo et al, 2016   | 879              | 535              | 305     | 172    | 681               | 397               | 301         | 167         |
| Weisz et al, 2015      | 5039             | 1790             | 2080    | 703    | 4731              | 1645              | 1464        | 480         |
| Hokimoto et al, 2014   | 97               | 36               | 57      | 18     | 85                | 32                | 20          | 9           |
| Shih et al, 2014       | 43420            | 43420            | 27229   | 27230  | 38105             | 38105             |             |             |
| Zou et al, 2014        | 1031             | 4412             | 346     | 1597   | 913               | 1597              | 454         | 1993        |
| Burkard et al, 2012    | 450              | 79               | 119     | 32     | 80                | 525               | 206         | 27          |
| Chitose et al, 2012    | 349              | 144              | 151     | 64     | 257               | 110               | 113         | 48          |
| Goodman et al, 2012    |                  |                  |         |        |                   |                   |             |             |
| Ng et al, 2012         |                  |                  |         |        |                   |                   | 28          | 32          |
| Yano et al, 2012       | 44               | 44               | 10      | 19     | 40                | 39                | 37          | 40          |
| Hsu et al, 2011        | 57               | 56               | 23      | 35     |                   |                   | 5           | 10          |
| Ren et al, 2011        |                  |                  |         |        |                   |                   |             |             |
| Rossini et al, 2011    |                  |                  |         |        |                   |                   |             |             |
| Simon et al, 2011      | 481              | 749              | 314     | 433    | 431               | 614               | 301         | 512         |
| Bhatt et al, 2010      | 1497             | 1526             | 593     | 536    | 1478              | 1446              | 234         | 265         |
| Cai et al, 2010        |                  |                  |         |        |                   |                   |             |             |
| Charlot et al, 2010    |                  |                  |         |        |                   |                   |             |             |
| Evanchan et al, 2010   | 2835             | 837              | 1601    | 630    | 2734              | 850               |             |             |
| Gupta et al, 2010      | 166              | 55               | 73      | 26     | 146               | 48                | 81          | 18          |
| Hudzik et al, 2010     | 14               | 13               | 6       | 8      | 15                | 13                |             |             |
| Kreutz et al, 2010     |                  |                  |         |        |                   |                   |             |             |
| Ray et al, 2010        |                  |                  |         |        |                   |                   |             |             |
| Stockl et al, 2010     | 5                | 10               | 3       | 6      |                   |                   |             |             |
| Van Boxel et al, 2010  |                  |                  |         |        |                   |                   |             |             |
| O'Donoghue et al, 2009 | 55               | 22               | 18      | 11     | 61                | 25                | 7           | 9           |
| Rassen et al, 2009     | 9577             | 2894             | 4619    | 1389   |                   |                   |             |             |

DM: diabetes mellitus; n: number of patients; PPI: proton pump inhibitor

## SUPPLEMENTARY RESULTS

### Results of fixed effects models

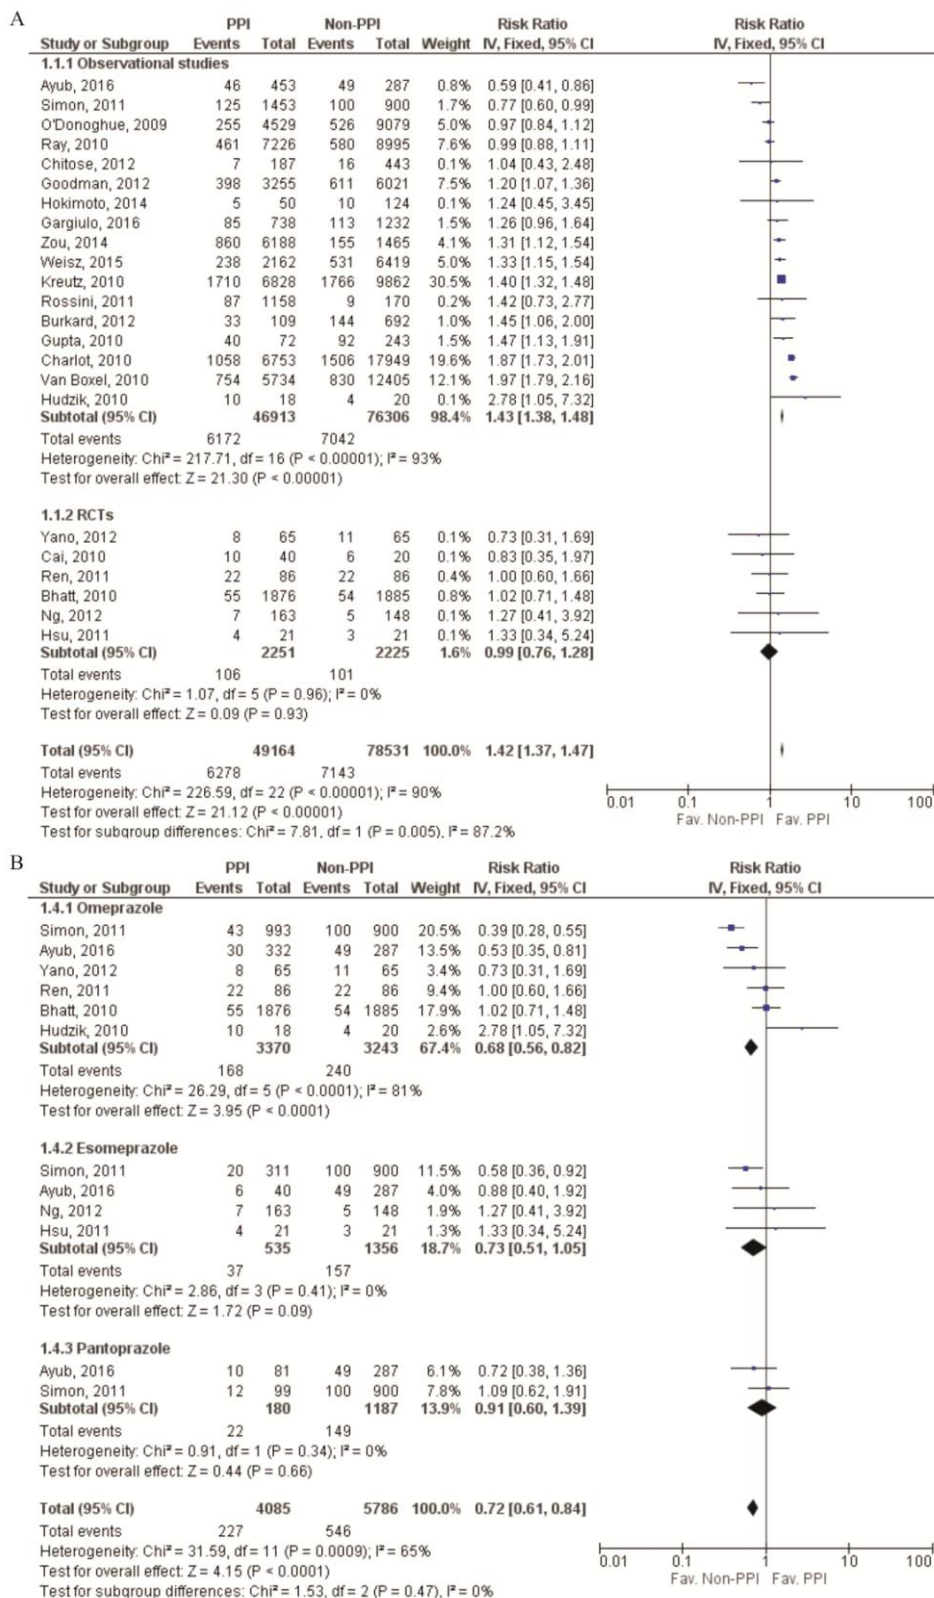

**Supplementary Figure 1** Forrest plots representing the estimated risk of major adverse cardiac event using fixed effects model. (A: overall outcome; B: outcome occurrence in case of different PPIs) *CI: confidence interval; PPI: proton pump inhibitor; RCT: randomized controlled trials.*

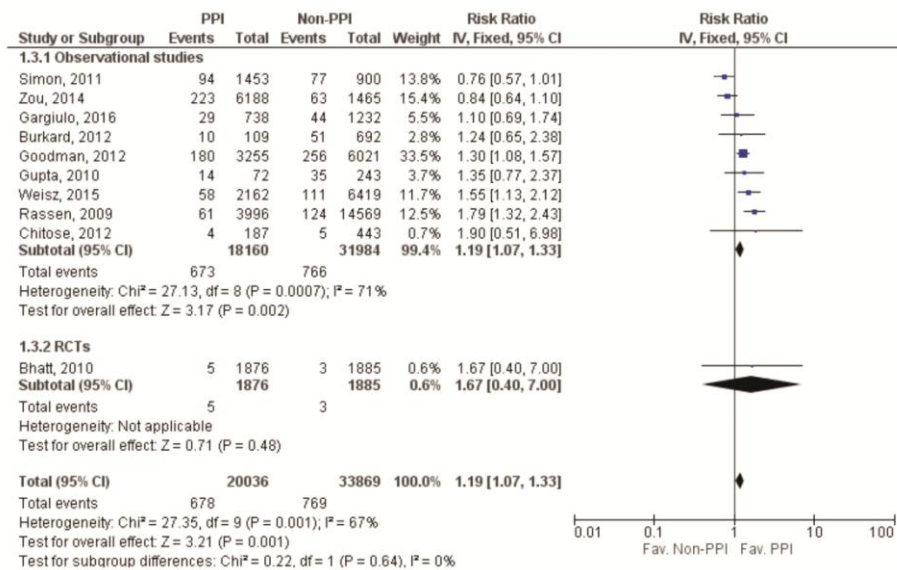

**Supplementary Figure 2** Forrest plot representing the estimated risk of cardiovascular death using fixed effects model. *CI*: confidence interval; *PPI*: proton pump inhibitor; *RCT*: randomized controlled trials.

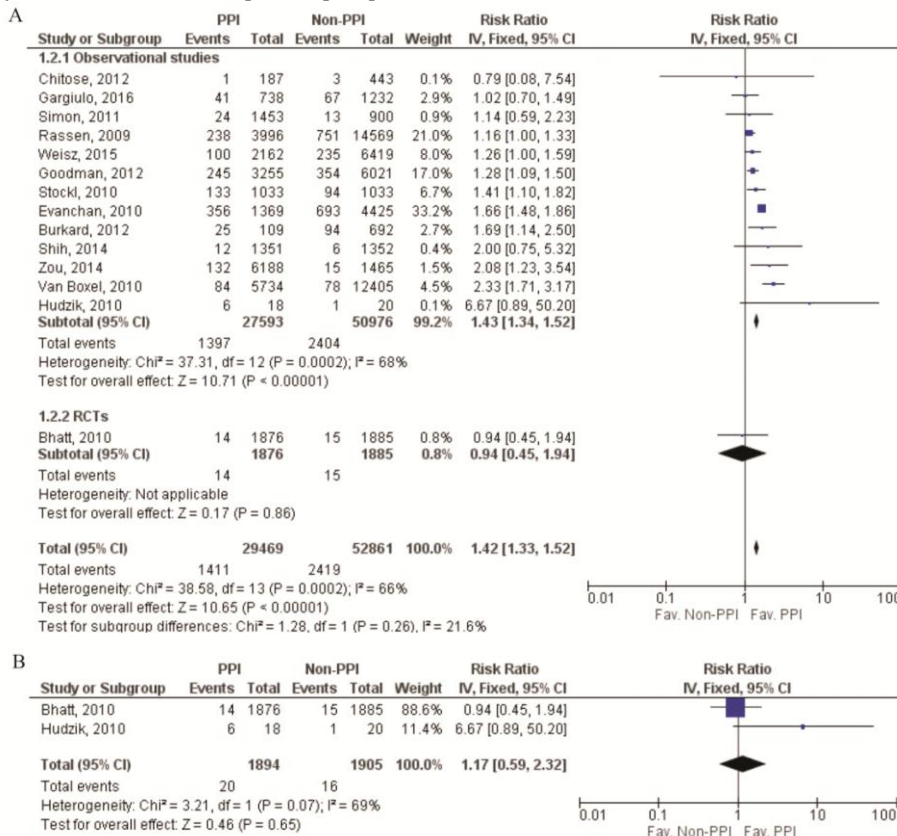

**Supplementary Figure 3** Forrest plots representing the estimated risk of myocardial infarction using fixed effects model. (A: overall outcome; B: outcome occurrence in case of omeprazole) *CI*: confidence interval; *PPI*: proton pump inhibitor; *RCT*: randomized controlled trials.



## Statistical analysis of adjusted hazard ratios

Adjusted hazard ratios (HRs) for all three major outcomes (major adverse cardiac event (MACE), cardiovascular (CV) death, myocardial infarction (MI) were available from observational studies.

Six studies reported adjusted HRs for overall MACE outcome (Ray et al., 2010; van Boxel et al., 2010; Goodman et al., 2012; Zou et al., 2014; Weisz et al., 2015; Gargiulo et al., 2016). The results showed that the risk of MACE was significantly higher in the clopidogrel plus PPI group (HR=1.25, 95% CI=1.03–1.51,  $p=0.02$ ) (**Supplementary Figure 4A–B**). We have found considerable heterogeneity across the included studies ( $I^2=88%$ ,  $p<0.001$ ); the random effects model was used. In the case of specific PPIs, four studies (O'Donoghue et al., 2009; Charlot et al., 2010; Kreutz et al., 2010; Ray et al., 2010) presented data on adjusted HRs for omeprazole, esomeprazole and pantoprazole (**Supplementary Figure 4C–D**). The results showed that there is no difference between the clopidogrel alone and clopidogrel plus PPI groups in case of esomeprazole (HR=1.17, 95% CI=0.90–1.53,  $p=0.25$ ), omeprazole (HR=1.12, 95% CI=0.86–1.45,  $p=0.41$ ), and pantoprazole (HR=1.25, 95% CI=0.99–1.57,  $p=0.06$ ). In the specified PPI groups, we also found considerable heterogeneity (esomeprazole: 84%,  $p<0.001$ ; omeprazole: 82%,  $p=0.001$ ; pantoprazole: 85%,  $p<0.001$ ), the random effects model was used for the analysis.

Two studies contained eligible data on CV death (Goodman et al., 2012; Gargiulo et al., 2016) (**Supplementary Figure 5A–B**), and according to their results, there was no significant effect of concomitant clopidogrel and PPI treatment on CV death (HR=1.16, 95% CI=0.72–1.87,  $p=0.53$ ). Data on MI was reported in six studies (Stockl et al., 2010; van Boxel et al., 2010; Goodman et al., 2012; Shih et al., 2014; Zou et al., 2014; Gargiulo et al., 2016) (**Supplementary Figure 6A–B**), and the risk for MI was significantly higher in the PPI plus clopidogrel group (HR=1.46, 95% CI=1.08–1.96,  $p=0.01$ ). For the CV death and MI outcomes the heterogeneity may represent substantial-moderate heterogeneity (70–60%,  $p=0.07–0.03$ , respectively), the random effects model was used for both outcomes.

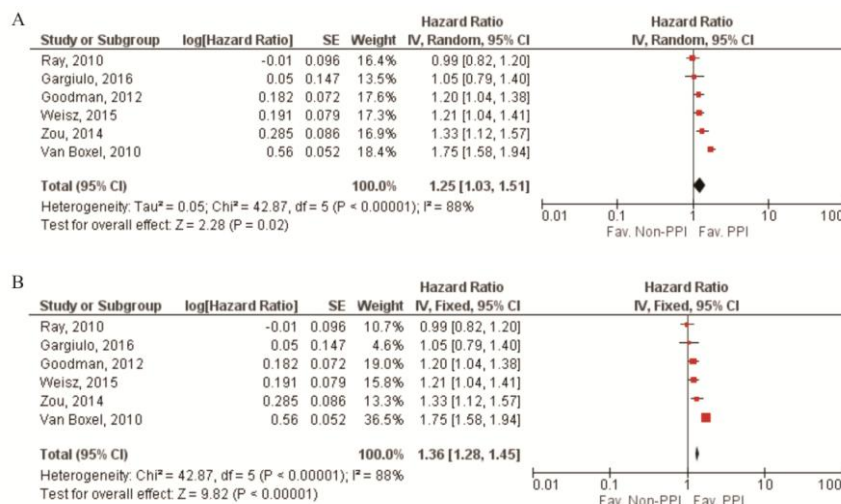

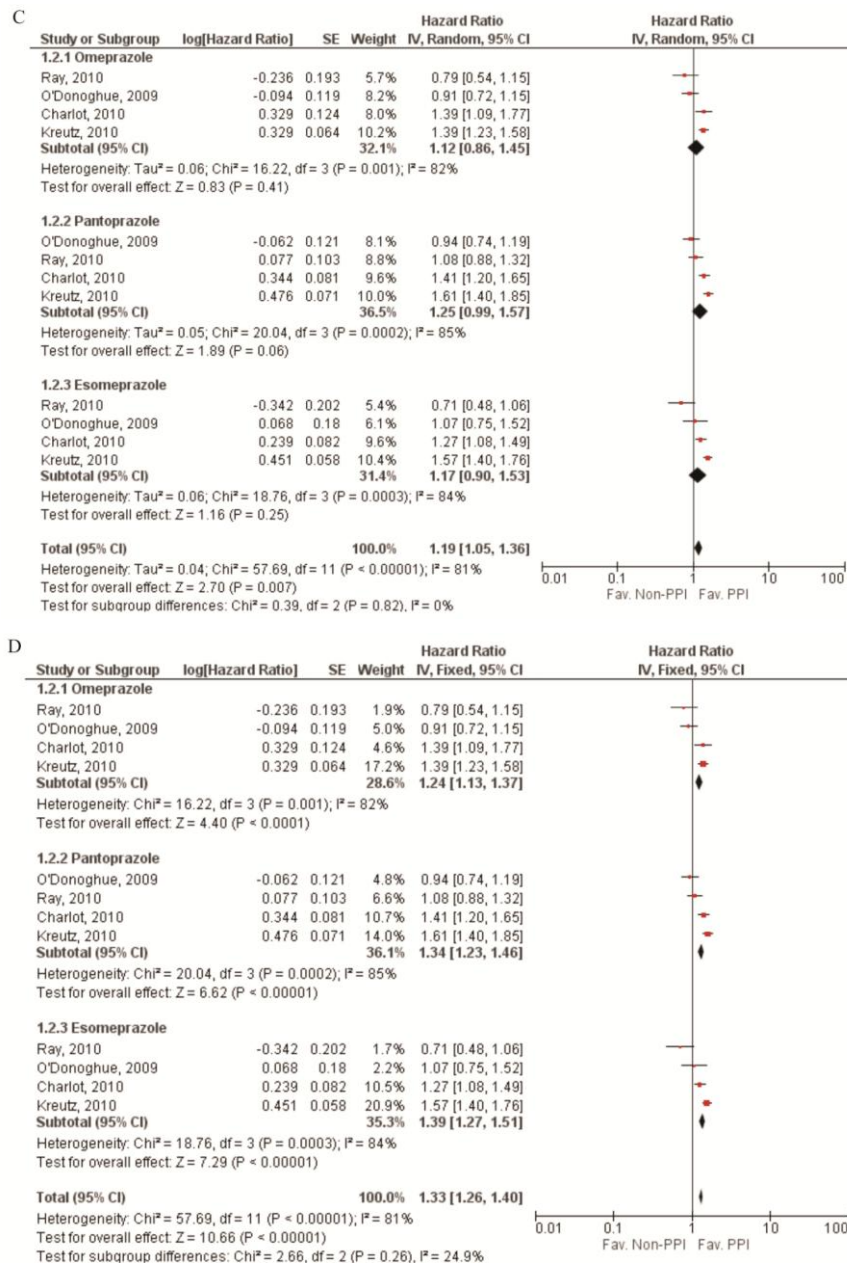

**Supplementary Figure 4** Forrest plots representing the analysis of adjusted events for overall major adverse cardiac events (A–B), and for different PPIs (C–D) using random (A, C) and fixed (B, D) effects models. *CI*: confidence interval; *PPI*: proton pump inhibitor.



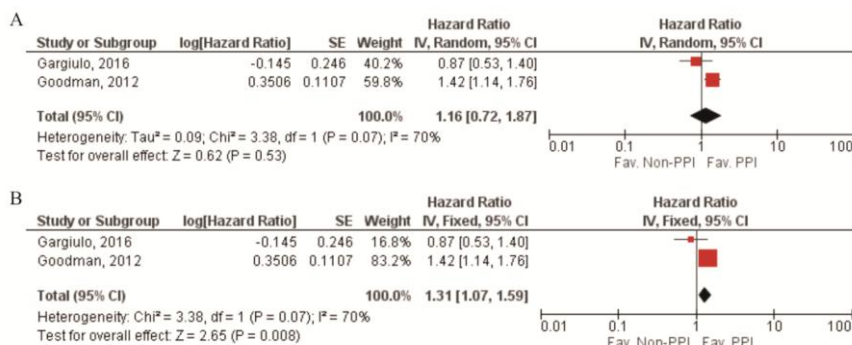

**Supplementary Figure 5** Forrest plots representing the analysis of adjusted events for cardiovascular death, using random (A) and fixed (B) effects models. *CI: confidence interval; PPI: proton pump inhibitor.*

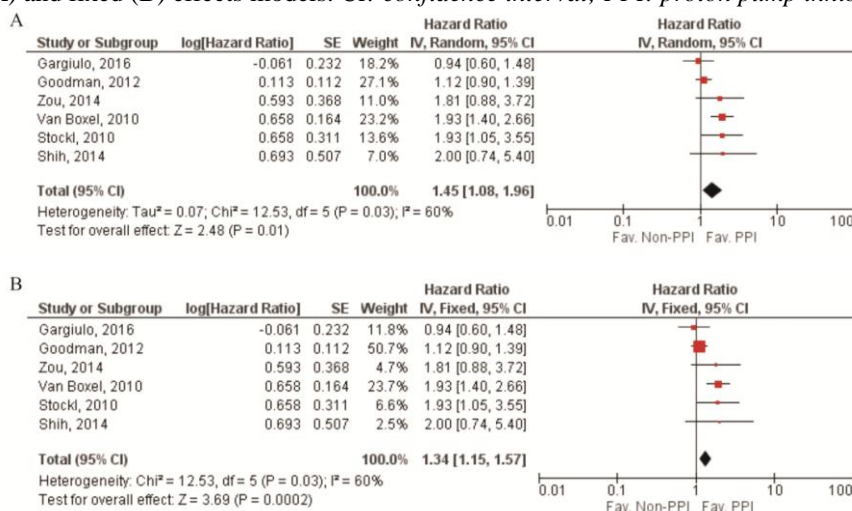

**Supplementary Figure 6** Forrest plots representing the analysis of adjusted events for myocardial infarction, using random (A) and fixed (B) effects models. *CI: confidence interval; PPI: proton pump inhibitor.*

### Abbreviations

CV: cardiovascular  
 HR: hazard ratio  
 MACE: major adverse cardiac event  
 MI: myocardial infarction

### References

- Charlot, M., Ahlehoff, O., Norgaard, M.L., Jorgensen, C.H., Sorensen, R., Abildstrom, S.Z., et al. (2010). Proton-pump inhibitors are associated with increased cardiovascular risk independent of clopidogrel use: a nationwide cohort study. *Ann Intern Med* 153(6), 378-386. doi: 10.7326/0003-4819-153-6-201009210-00005.
- Gargiulo, G., Costa, F., Ariotti, S., Biscaglia, S., Campo, G., Esposito, G., et al. (2016). Impact of proton pump inhibitors on clinical outcomes in patients treated with a 6- or 24-month dual-antiplatelet therapy duration: Insights from the PROlonging Dual-antiplatelet treatment after Grading stent-induced Intimal hyperplasia study trial. *Am Heart J* 174, 95-102. doi: 10.1016/j.ahj.2016.01.015.
- Goodman, S.G., Clare, R., Pieper, K.S., Nicolau, J.C., Storey, R.F., Cantor, W.J., et al. (2012). Association of proton pump inhibitor use on cardiovascular outcomes with clopidogrel and ticagrelor: insights from the platelet inhibition and patient outcomes trial. *Circulation* 125(8), 978-986. doi: 10.1161/circulationaha.111.032912.

- Kreutz, R.P., Stanek, E.J., Aubert, R., Yao, J., Breall, J.A., Desta, Z., et al. (2010). Impact of proton pump inhibitors on the effectiveness of clopidogrel after coronary stent placement: the clopidogrel Medco outcomes study. *Pharmacotherapy* 30(8), 787-796. doi: 10.1592/phco.30.8.787.
- O'Donoghue, M.L., Braunwald, E., Antman, E.M., Murphy, S.A., Bates, E.R., Rozenman, Y., et al. (2009). Pharmacodynamic effect and clinical efficacy of clopidogrel and prasugrel with or without a proton-pump inhibitor: an analysis of two randomised trials. *Lancet* 374(9694), 989-997. doi: 10.1016/s0140-6736(09)61525-7.
- Ray, W.A., Murray, K.T., Griffin, M.R., Chung, C.P., Smalley, W.E., Hall, K., et al. (2010). Outcomes with concurrent use of clopidogrel and proton-pump inhibitors: a cohort study. *Ann Intern Med* 152(6), 337-345. doi: 10.7326/0003-4819-152-6-201003160-00003.
- Shih, C.J., Chen, Y.T., Ou, S.M., Li, S.Y., Chen, T.J., and Wang, S.J. (2014). Proton pump inhibitor use represents an independent risk factor for myocardial infarction. *Int J Cardiol* 177(1), 292-297. doi: 10.1016/j.ijcard.2014.09.036.
- Stockl, K.M., Le, L., Zakharyan, A., Harada, A.S., Solow, B.K., Addiego, J.E., et al. (2010). Risk of rehospitalization for patients using clopidogrel with a proton pump inhibitor. *Arch Intern Med* 170(8), 704-710. doi: 10.1001/archinternmed.2010.34.
- van Boxel, O.S., van Oijen, M.G., Hagens, M.P., Smout, A.J., and Siersema, P.D. (2010). Cardiovascular and gastrointestinal outcomes in clopidogrel users on proton pump inhibitors: results of a large Dutch cohort study. *Am J Gastroenterol* 105(11), 2430-2436; quiz 2437. doi: 10.1038/ajg.2010.334.
- Weisz, G., Smilowitz, N.R., Kirtane, A.J., Rinaldi, M.J., Parvataneni, R., Xu, K., et al. (2015). Proton Pump Inhibitors, Platelet Reactivity, and Cardiovascular Outcomes After Drug-Eluting Stents in Clopidogrel-Treated Patients: The ADAPT-DES Study. *Circ Cardiovasc Interv* 8(10). doi: 10.1161/circinterventions.114.001952.
- Zou, J.J., Chen, S.L., Tan, J., Lin, L., Zhao, Y.Y., Xu, H.M., et al. (2014). Increased risk for developing major adverse cardiovascular events in stented Chinese patients treated with dual antiplatelet therapy after concomitant use of the proton pump inhibitor. *PLoS One* 9(1), e84985. doi: 10.1371/journal.pone.0084985.

## RISK OF BIAS ASSESSMENT

### Cochrane Risk of Bias Tool

#### 1.) Study: Bhatt et al, 2010

##### A) Random sequence generation

**Review authors' judgment:** Unclear risk

**Notes on rating:** No information is available about random sequence generation (permuted block randomization with stratification by H. pylori status and concomitant NSAID use).

##### B) Allocation concealment

**Review authors' judgment:** Low risk

**Notes on rating:** Randomization was performed centrally by CRO.

##### C) Blinding of participants and personnel

**Review authors' judgment:** Low risk

**Notes on rating:** Blinded.

##### D) Blinding of outcome assessment

**Review authors' judgment:** Low risk.

**Notes on rating:** Blinded.

##### E) Incomplete outcome data

**Review authors' judgment:** Low risk.

**Notes on rating:** Planned drop-out: maximum 20%, 3,761 of 3,873 randomized patients were included in analysis (drop-out: 2.8%). The negligible drop-out is unlikely to introduce bias.

##### F) Selective reporting

**Review authors' judgment:** Low risk.

**Notes on rating:** Study protocol is available at [nejm.org](http://nejm.org) (detailed) and [ClinicalTrials.gov](http://ClinicalTrials.gov) (brief) (NCT00557921), all relevant outcomes are reported.

##### G) Other sources of bias

**Review authors' judgment:** High risk.

**Notes on rating:** The study ended prematurely due to lack of financial resources (the planned number of gastrointestinal events was not reached).

#### 2.) Study: Hsu et al, 2011

##### A) Random sequence generation

**Review authors' judgment:** Low risk

**Notes on rating:** Computer-generated sequence.

##### B) Allocation concealment

**Review authors' judgment:** Low risk

**Notes on rating:** Consecutively numbered sealed envelopes.

##### C) Blinding of participants and personnel

**Review authors' judgment:** High risk.

**Notes on rating:** Open label.

**D) Blinding of outcome assessment**

**Review authors' judgment:** High risk.

**Notes on rating:** Open label.

**E) Incomplete outcome data**

**Review authors' judgment:** Low risk.

**Notes on rating:** Balanced drop-out from both study arms (4.5% vs. 5.1%). Both intention-to-treat and per-protocol analyses were performed.

**F) Selective reporting**

**Review authors' judgment:** Low risk.

**Notes on rating:** Study protocol is available at ClinicalTrials.gov (NCT01138969), all relevant outcomes are reported.

**G) Other sources of bias**

**Review authors' judgment:** Unclear risk.

**Notes on rating:** In intention-to-treat analysis, patients missing final endoscopy were assumed to have normal findings. This assumption may impose risk of bias.

**3.) Study: Ng et al, 2012**

**A) Random sequence generation**

**Review authors' judgment:** Low risk.

**Notes on rating:** Randomly shuffled envelopes.

**B) Allocation concealment**

**Review authors' judgment:** Low risk.

**Notes on rating:** Identical, blinded, and sealed envelopes.

**C) Blinding of participants and personnel**

**Review authors' judgment:** Low risk.

**Notes on rating:** Blinded.

**D) Blinding of outcome assessment**

**Review authors' judgment:** Low risk.

**Notes on rating:** Blinded.

**E) Incomplete outcome data**

**Review authors' judgment:** Low risk.

**Notes on rating:** One patient has withdrawn before the first dose of the drug from each arm. Drop-out is unlikely to introduce bias.

**F) Selective reporting**

**Review authors' judgment:** Low risk.

**Notes on rating:** Study protocol is available at ClinicalTrials.gov (NCT00683111), all relevant outcomes are reported.

**G) Other sources of bias**

**Review authors' judgment:** Low risk.

**Notes on rating:** The study is free of other sources of bias.

**4.) Study: Yano et al, 2012**

**A) Random sequence generation**

**Review authors' judgment:** Low risk

**Notes on rating:** Computer-generated sequence.

**B) Allocation concealment**

**Review authors' judgment:** Unclear risk

**Notes on rating:** Randomization was performed at the central registration site (details about the personnel/party involved in the process are not provided).

**C) Blinding of participants and personnel**

**Review authors' judgment:** High risk.

**Notes on rating:** Open label.

**D) Blinding of outcome assessment**

**Review authors' judgment:** High risk.

**Notes on rating:** Open label.

**E) Incomplete outcome data**

**Review authors' judgment:** High risk.

**Notes on rating:** Although the drop-out is balanced between study-arms and the loss is justified in details, drop-out rate is considerably high (28%), which is likely to introduce bias. The authors did not perform intention-to-treat analysis.

**F) Selective reporting**

**Review authors' judgment:** Unclear risk.

**Notes on rating:** We failed to identify protocol of the study, however, the study reported on all outcomes mentioned in the Methods section of the article. Possibility of selective outcome reporting cannot be excluded.

**G) Other sources of bias**

**Review authors' judgment:** Low risk.

**Notes on rating:** The study is free of other sources of bias.

| Randomized controlled trials | Random sequence generation (Selection bias) | Allocation concealment (Selection bias) | Blinding of participants and personnel (Performance bias) | Blinding of outcome assessment (Detection bias) | Incomplete outcome data (Attrition bias) | Selective reporting (Reporting bias) | Other bias |
|------------------------------|---------------------------------------------|-----------------------------------------|-----------------------------------------------------------|-------------------------------------------------|------------------------------------------|--------------------------------------|------------|
| Ng et al, 2012               | +                                           | +                                       | +                                                         | +                                               | +                                        | +                                    | +          |
| Yano et al, 2012             | +                                           | ?                                       | -                                                         | -                                               | -                                        | ?                                    | +          |
| Hsu et al, 2011              | +                                           | +                                       | -                                                         | -                                               | +                                        | +                                    | ?          |
| Ren et al, 2011              | ?                                           | ?                                       | ?                                                         | ?                                               | +                                        | +                                    | +          |
| Bhatt et al, 2010            | ?                                           | +                                       | +                                                         | +                                               | +                                        | +                                    | -          |
| Cai et al, 2010              | +                                           | ?                                       | -                                                         | ?                                               | -                                        | -                                    | ?          |

**Supplementary Figure 7A** Quality assessment of randomized controlled trials. *Green: low risk of bias; yellow: uncertain risk of bias; red: high risk of bias; BMI: body mass index.*

## Modified Newcastle-Ottawa Scale

### 1. Representativeness of the exposed group:

*Low risk:* Patients are truly representative to the average population receiving clopidogrel plus proton pump inhibitor.

*High risk:* Any unjustified inclusion or exclusion criteria applied (e.g., inclusion of patients above 60 years of age exclusively, or exclusion of patients with low cardiovascular risk).

*Uncertain risk:* No (or unsatisfactory) information about the inclusion or exclusion of patients.

### 2. Selection of the non-exposed group:

*Low risk:* Patients are truly representative to the average population receiving clopidogrel without proton pump inhibitor.

*High risk:* Any unjustified inclusion or exclusion criteria applied (e.g., inclusion of patients above 60 years of age exclusively or exclusion of patients with low cardiovascular risk).

*Uncertain risk:* No (or unsatisfactory) information about the inclusion or exclusion of patients.

### 3. Ascertainment of exposure:

*Low risk:* Objective assessment of compliance regarding proton pump inhibitor intake (e.g., laboratory tests).

*High risk:* Subjective assessment of compliance regarding PPI intake (e.g., questionnaire).

*Uncertain risk:* No information.

### 4. Demonstration that outcome of interest was not present at start of study:

*Low risk:* All outcomes were not present at the start of the study.

*High risk:* Any outcome was present at the start of the study.

*Uncertain risk:* No information.

### 5A. Study controls for age:

*Low risk:* No difference in age between groups (statistically verified).

*High risk:* Difference in age between groups (statistically verified).

*Uncertain risk:* No comparison made within the study.

### 5B. Study controls for body mass index:

*Low risk:* No difference in age between groups (statistically verified).

*High risk:* Difference in age between groups (statistically verified).

*Uncertain risk:* No comparison made within the study.

### 6. Was follow-up long enough for outcomes to occur:

*Low risk:* At least 1 month follow-up.



*High risk:* Less than 1 month follow-up.

*Uncertain risk:* No information about the length of follow-up.

### 7. Adequacy of follow up of cohorts:

*Low risk:* Complete follow-up or the drop-out is unlikely to introduce bias (e.g., negligible number of loss, random drop-out).

*High risk:* Incomplete follow-up which is likely to introduce bias (e.g., non-random drops due to adverse effects).

*Uncertain risk:* No information about the loss.

| Observational studies  | Representativeness of the exposed (Selection bias) | Selection of the non-exposed (Selection bias) | Ascertainment of exposure (Selection bias) | Demonstration that outcome of interest was not present at start of study (Selection bias) | Study controls for age (Comparability bias) | Study controls for BMI (Comparability bias) | Was follow-up long enough for outcomes to occur (Outcome bias) | Adequacy of follow-up of cohorts (Outcome bias) |
|------------------------|----------------------------------------------------|-----------------------------------------------|--------------------------------------------|-------------------------------------------------------------------------------------------|---------------------------------------------|---------------------------------------------|----------------------------------------------------------------|-------------------------------------------------|
| Ayub et al, 2016       | +                                                  | +                                             | ?                                          | ?                                                                                         | +                                           | +                                           | +                                                              | ?                                               |
| Gargiulo et al, 2016   | +                                                  | +                                             | ?                                          | -                                                                                         | -                                           | +                                           | +                                                              | +                                               |
| Weisz et al, 2015      | +                                                  | +                                             | ?                                          | -                                                                                         | -                                           | +                                           | +                                                              | +                                               |
| Hokimoto et al, 2014   | +                                                  | +                                             | ?                                          | ?                                                                                         | +                                           | +                                           | +                                                              | ?                                               |
| Shih et al, 2014       | +                                                  | +                                             | ?                                          | ?                                                                                         | +                                           | ?                                           | +                                                              | ?                                               |
| Zou et al, 2014        | +                                                  | +                                             | -                                          | -                                                                                         | +                                           | +                                           | +                                                              | +                                               |
| Burkard et al, 2012    | +                                                  | +                                             | ?                                          | -                                                                                         | -                                           | ?                                           | +                                                              | +                                               |
| Chitose et al, 2012    | +                                                  | +                                             | ?                                          | -                                                                                         | +                                           | +                                           | +                                                              | ?                                               |
| Goodman et al, 2012    | +                                                  | +                                             | -                                          | -                                                                                         | -                                           | ?                                           | +                                                              | +                                               |
| Rossini et al, 2011    | +                                                  | +                                             | ?                                          | ?                                                                                         | ?                                           | ?                                           | +                                                              | ?                                               |
| Simon et al, 2011      | +                                                  | +                                             | ?                                          | -                                                                                         | -                                           | +                                           | +                                                              | ?                                               |
| Charlot et al, 2010    | +                                                  | +                                             | ?                                          | -                                                                                         | -                                           | ?                                           | +                                                              | +                                               |
| Evanchan et al, 2010   | +                                                  | +                                             | -                                          | -                                                                                         | ?                                           | ?                                           | +                                                              | ?                                               |
| Gupta et al, 2010      | +                                                  | +                                             | ?                                          | -                                                                                         | +                                           | ?                                           | +                                                              | ?                                               |
| Hudzik et al, 2010     | +                                                  | +                                             | ?                                          | -                                                                                         | +                                           | +                                           | +                                                              | +                                               |
| Kreutz et al, 2010     | +                                                  | +                                             | -                                          | -                                                                                         | -                                           | ?                                           | +                                                              | ?                                               |
| Ray et al, 2010        | +                                                  | +                                             | ?                                          | -                                                                                         | +                                           | ?                                           | +                                                              | ?                                               |
| Stockl et al, 2010     | +                                                  | +                                             | -                                          | -                                                                                         | +                                           | ?                                           | +                                                              | +                                               |
| Van Boxel et al, 2010  | +                                                  | +                                             | -                                          | ?                                                                                         | -                                           | ?                                           | +                                                              | ?                                               |
| Rassen et al, 2009     | -                                                  | -                                             | -                                          | -                                                                                         | ?                                           | ?                                           | +                                                              | ?                                               |
| O'Donoghue et al, 2009 | +                                                  | +                                             | ?                                          | -                                                                                         | -                                           | -                                           | ?                                                              | +                                               |

**Supplementary Figure 7B** Modified Newcastle–Ottawa scale for risk of bias assessment of observational studies. *Green: low risk of bias; yellow: uncertain risk of bias; red: high risk of bias; BMI: body mass index.*
